# Supplementary material for: Highly photoluminescent superparamagnetic silica composites for on-site biosensors
Source: Royal Society of Chemistry journal article supplement (doi:10.1039/c3tb21331e), 2014-01-01
Supplement: c3tb21331e1.pdf [file c3tb21331e1.pdf]

Supporting Information for  
**Highly Photoluminescent Superparamagnetic Silica Composites for on-Site  
Biosensor**

Wooyoung Park, Mi Jung Kim, Yuri Choe, Sang Kyung Kim\*, and Kyoungja Woo\*

**Abbreviations**

|                    |                                                             |
|--------------------|-------------------------------------------------------------|
| <b>M</b>           | magnetic core                                               |
| <b>MS</b>          | magnetic core surrounded with thick silica shell            |
| <b>Q</b>           | self-assembled quantum dot (QD) layer                       |
| <b>MSQ</b>         | <b>MS</b> with <b>Q</b>                                     |
| <b>MSQS</b>        | <b>MSQ</b> coated with a thin silica shell                  |
| <b>A</b>           | aptamer                                                     |
| <b>qDNA</b>        | quencher-bonded oligo-DNA                                   |
| <b>qA</b>          | quencher-bonded <b>A</b>                                    |
| <b>T</b>           | thrombin                                                    |
| <b>MSQS-A</b>      | <b>MSQS</b> with immobilized <b>As</b>                      |
| <b>MSQS-A/qDNA</b> | <b>MSQS-A</b> hybridized with <b>qDNAs</b> through <b>A</b> |
| <b>MSQS-A/T</b>    | <b>MSQS-A</b> bonded to <b>T</b> through <b>A</b>           |

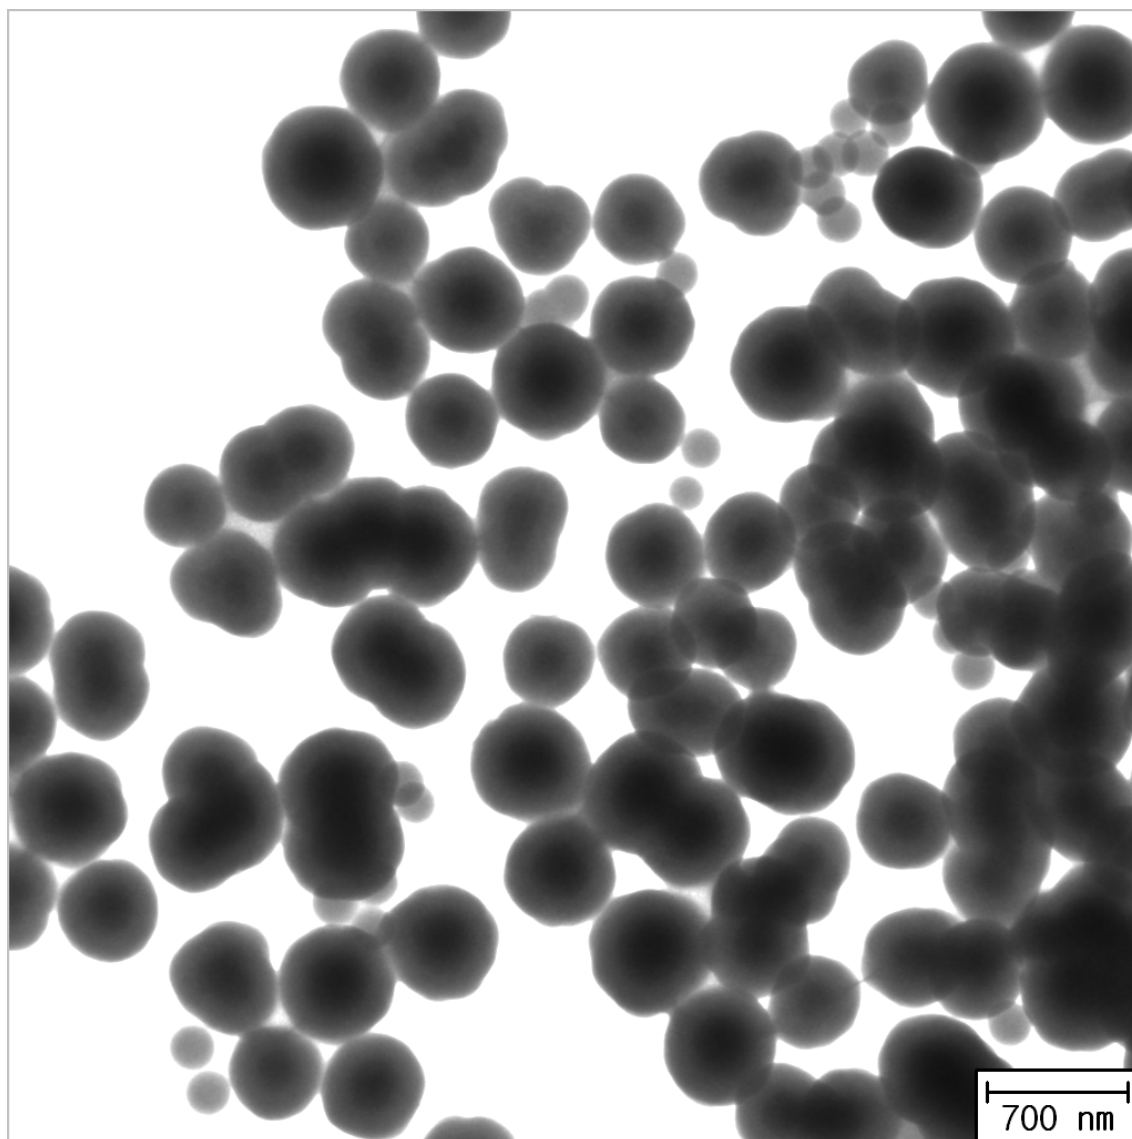

Figure S1. TEM image of many AP – **MS** particles.

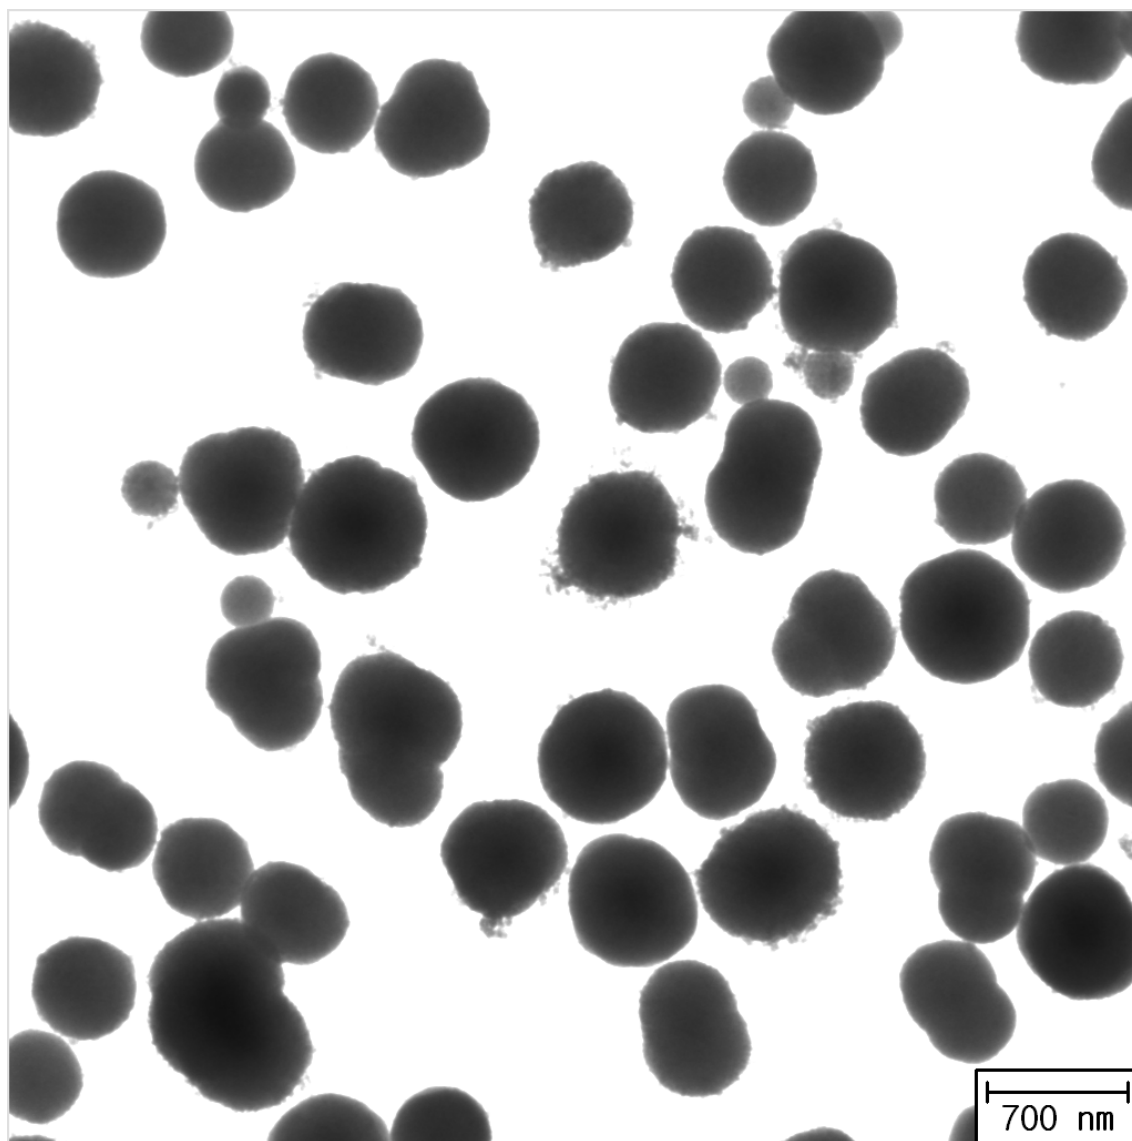

Figure S2. TEM image of many **MSQS** particles. (Average diameter  $\pm$  STD =  $568 \pm 78$  nm)

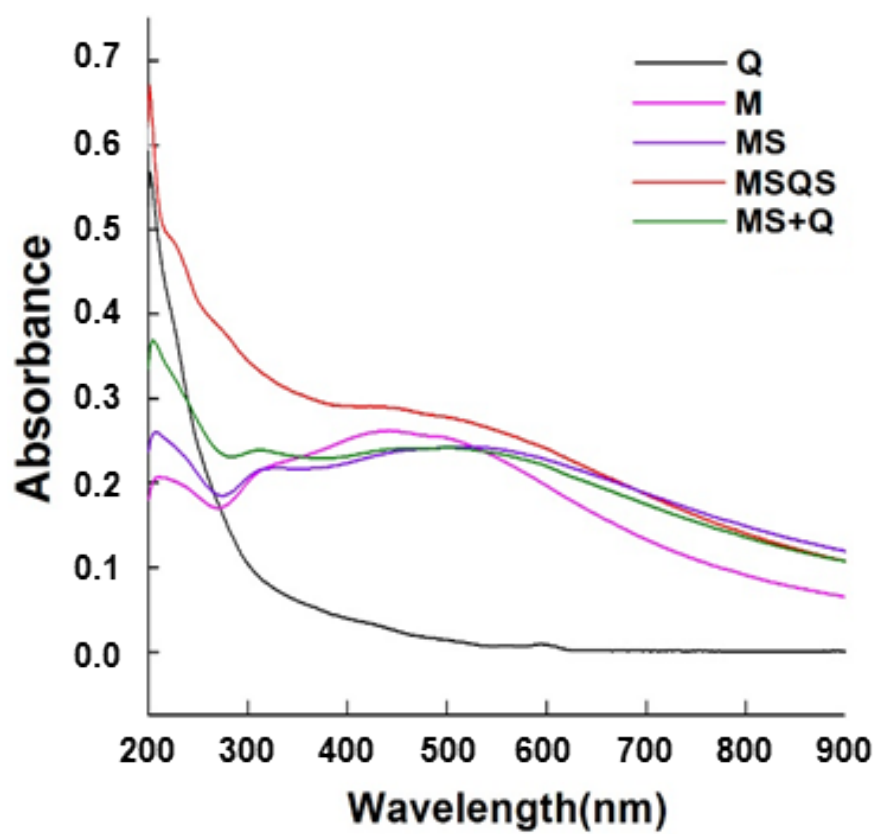

Figure S3. Absorption spectra of **Q** and **MSQS** analogues in the visible range.

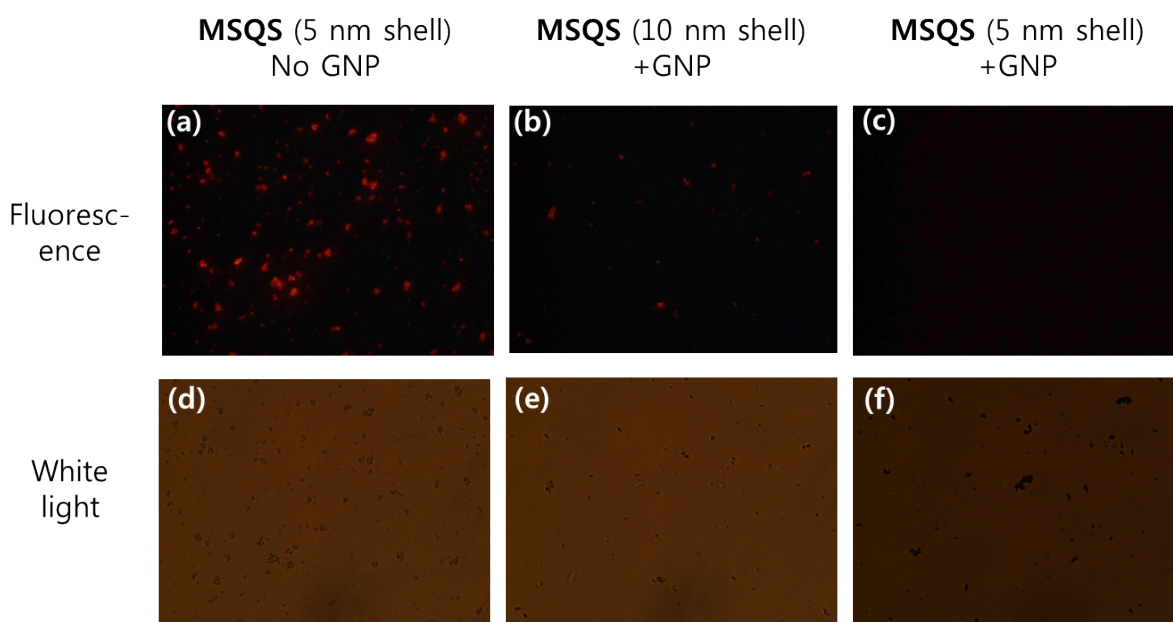

\*GNP : Gold Nano-Particle, diameter=15 nm

Figure S4. Quenching the fluorescence of AP-**MSQS** with GNP to evaluate the effect of silica shell thickness. AP-**MSQS** of 5 nm shell was quenched completely with GNP while the AP-**MSQS** of 10 nm shell emitted dim fluorescence. (0.1  $\mu\text{g}$  **MSQS** + 10 fmole GNP)

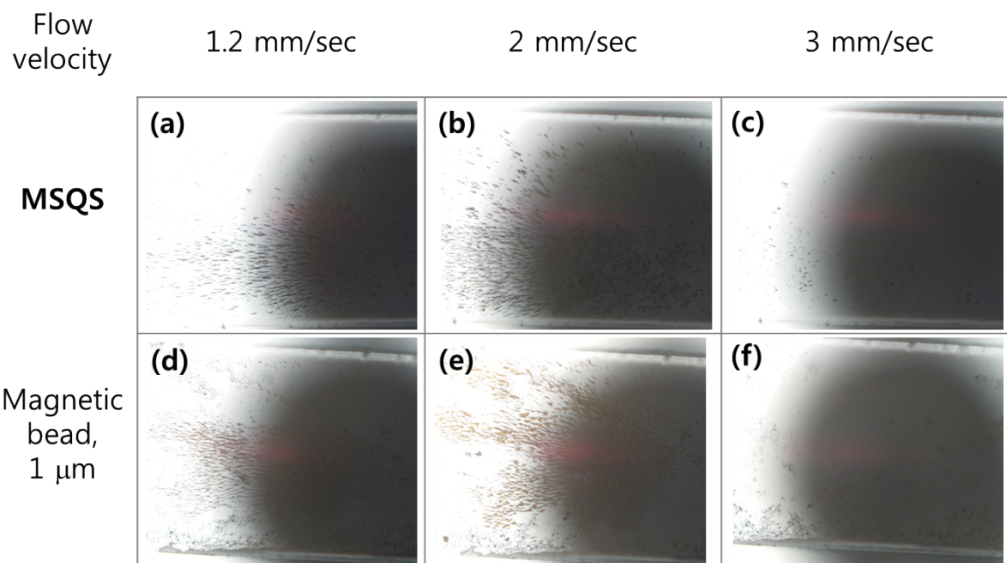

Figure S5. **MSQS** and commercial magnetic particles (Dynabeads MyOne<sup>®</sup>, Invitrogen) in a magnetophoretic channel. Magnetic susceptibility of the commercial magnetic particle provided by the vendor was  $0.064 \text{ emu} \cdot \text{g}^{-1}$ , which is much less than that of **MSQS**,  $7 \text{ emu} \cdot \text{g}^{-1}$ . The width and height of the channel were  $500 \mu\text{m}$  and  $80 \mu\text{m}$ , respectively. NdFeB magnet of 1 mm diameter was placed 1 mm apart from the bottom of the channel. Both of the magnetic particles could not withstand water flow over  $3 \text{ mm} \cdot \text{sec}^{-1}$ , implying similar magnetic capturing efficiencies.

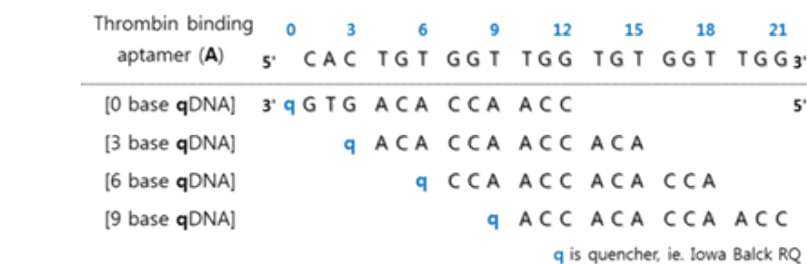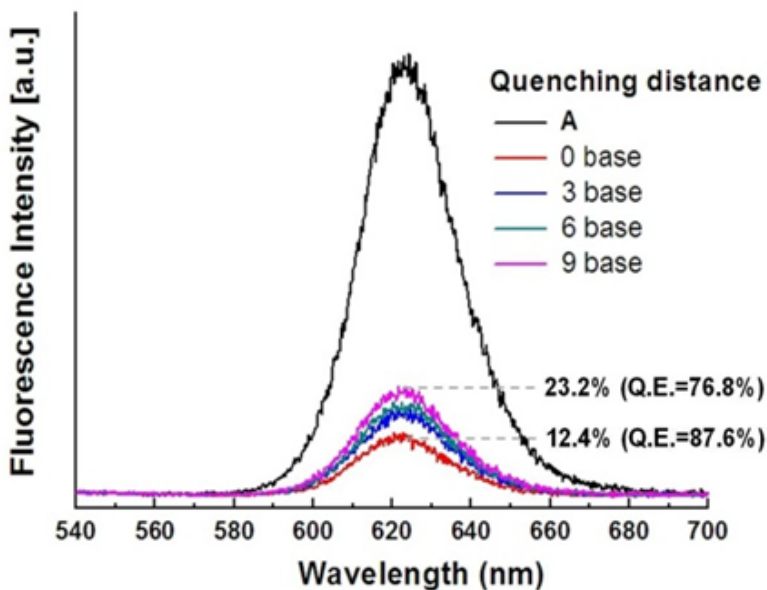

**Figure S6.** Fluorescence spectra from QDs modified with the aptamer and quenchers. Position of quencher varies from base 0 to base 9.

The thrombin binding aptamer was immobilized covalently on the QD, and the position of the quencher varied by three bases. The hybridization of qDNA was then varied by three bases. For single-stranded DNAs, each base is estimated to be 5 Å long. Thus, the nine-base quencher is about 5 nm from the QD surface. The hybridization of qDNA was carried out by incubation for 2 min at 50 °C and then, natural cooling for 30 min to 25 °C.

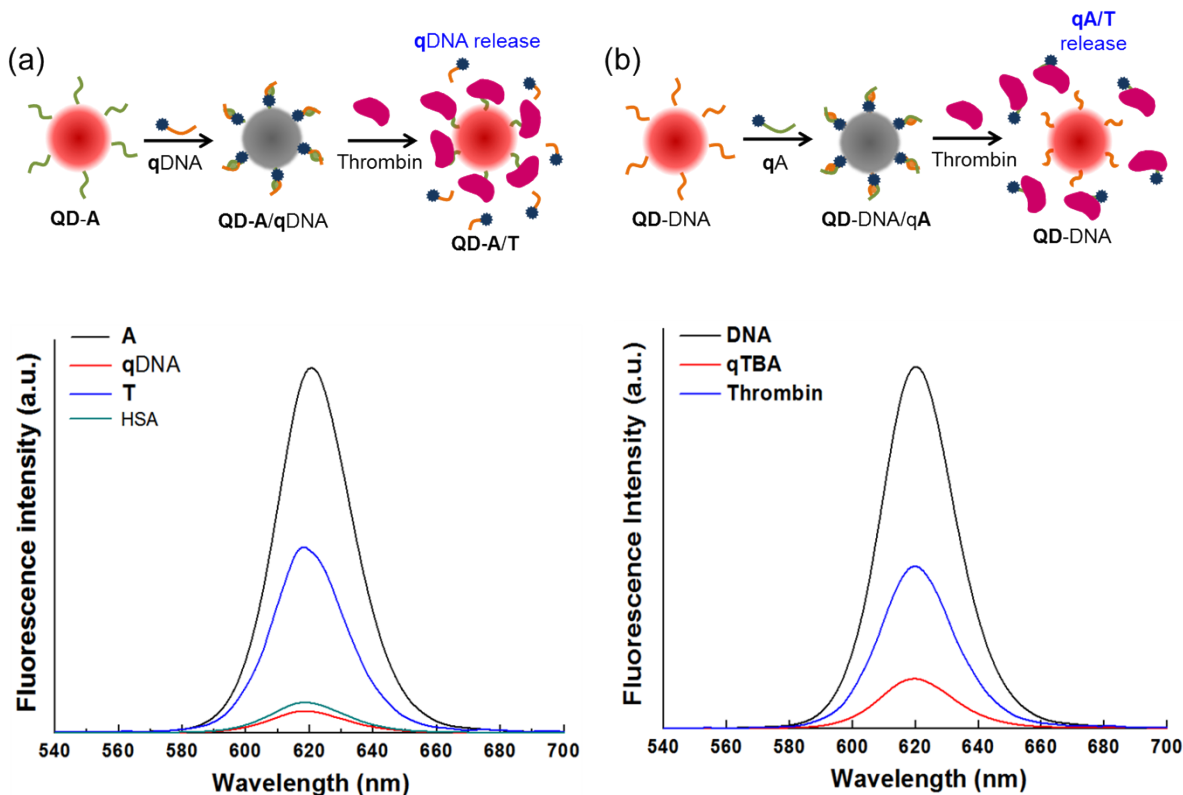

Figure S7. PL from QD solution at each step of immobilization, hybridization, and single-step assay (protein  $90 \mu\text{g}\cdot\text{mL}^{-1}$ ). Two configurations are compared; (a) A-immobilized QD and (b) DNA-immobilized QD.

The configuration of aptamers (As) and quenchers (qs) was investigated on QDs for better target binding and fluorescent signaling. Thrombin binding aptamer (A) was immobilized on QDs and qDNA was hybridized to A as in figure S7 (a). Another set of QDs was prepared where the position of A and DNA switched as in Figure S7 (b). The quencher-free DNA was immobilized on QDs and quencher-TBA (qA) was hybridized to DNA. Now, to recover the fluorescence of QDs, either qDNAs or qA/T complexes were released as described in Figure S7 (a) and (b). As expected, the qA could be hybridized to DNA and extinct fluorescence from QDs. However, the resultant quenching efficiency decreased by 8% (94% in (a) and 86% in (b)). The relatively bulky and negatively charged TBA seems to be less favorable to be concentrated on the surface

of a particle with the same hybridization energy of 12 bases ( $\sim 20 \text{ kcal} \cdot \text{mol}^{-1}$ ). Owing to the configurational differences, the ratio of fluorescent signal to background noise level could be varied from 3.2 (b) to 8.5 (a). The fluorescence intensity was measured after 5 minute-incubation of 200  $\mu\text{L}$  of binding buffer where the concentration of proteins and QD were  $100 \mu\text{g} \cdot \text{mL}^{-1}$  and 225 nM, respectively.
